# Supplementary material for: Protective Effects of Ellagitannin-Rich Strawberry Extracts on Biochemical and Metabolic Disturbances in Rats Fed a Diet High in Fructose
Source: PubMed Central journal article supplement (PMC5946230; doi:10.3390/nu10040445), 2018-04-04
Supplement: nutrients-10-00445-s001.pdf [file nutrients-10-00445-s001.pdf]

# Protective Effects of Ellagitannin-Rich Strawberry Extracts on Biochemical and Metabolic Disturbances in Rats Fed a Diet High in Fructose

Bartosz Fotschki <sup>1,\*</sup>, Jerzy Juśkiewicz <sup>1,\*</sup>, Krzysztof Kołodziejczyk <sup>2</sup>, Adam Jurgoński <sup>1</sup>,  
Monika Kosmala <sup>2</sup>, Joanna Milala <sup>2</sup>, Katarzyna Ognik <sup>3</sup> and Zenon Zduńczyk <sup>1</sup>

<sup>1</sup> Institute of Animal Reproduction and Food Research, Division of Food Science, Tuwima 10, 10-748 Olsztyn, Poland; a.jurgonski@pan.olsztyn.pl (A.J.); z.zdunczyk@pan.olsztyn.pl (Z.Z.)

<sup>2</sup> Institute of Food Technology and Analysis, Lodz University of Technology, Stefanowskiego 4/10, 90-924 Lodz, Poland; krzysztof.kolodziejczyk@p.lodz.pl (K.K.); monika.kosmala@p.lodz.pl (M.K.); joanna.milala@p.lodz.pl (J.M.)

<sup>3</sup> Department of Biochemistry and Toxicology, Faculty of Biology, Animal Sciences and Bioeconomy, University of Life Sciences, 20-950 Lublin, Poland; kasiaognik@poczta.fm

\* Correspondence: b.fotschki@pan.olsztyn.pl (B.F.); j.juskiewicz@pan.olsztyn.pl (J.J.);  
Tel.: +48-89-523-46-01 (B.F.); +48-89-523-46-73 (J.J.)

## Supplementary materials:

**Table S1.** Composition of the group-specific diets.

|                           | Group (%) |      |       |      |       |      |
|---------------------------|-----------|------|-------|------|-------|------|
|                           | C         | F    | C+ME  | F+ME | C+DE  | F+DE |
| Casein                    | 14.8      | 14.8 | 14.8  | 14.8 | 14.8  | 14.8 |
| Cellulose <sup>1</sup>    | 6         | 6    | 6     | 6    | 6     | 6    |
| Rapeseed oil              | 8         | 8    | 8     | 8    | 8     | 8    |
| Mineral mix <sup>2</sup>  | 3.5       | 3.5  | 3.5   | 3.5  | 3.5   | 3.5  |
| Vitamin mix <sup>3</sup>  | 1         | 1    | 1     | 1    | 1     | 1    |
| Choline chloride          | 0.2       | 0.2  | 0.2   | 0.2  | 0.2   | 0.2  |
| DL-methionine             | 0.2       | 0.2  | 0.2   | 0.2  | 0.2   | 0.2  |
| Cholesterol               | 0.5       | 0.5  | 0.5   | 0.5  | 0.5   | 0.5  |
| Monomeric ET-rich extract | 0         | 0    | 0.23  | 0.23 | 0     | 0    |
| Dimeric ET-rich extract   | 0         | 0    | 0     | 0    | 0.24  | 0.24 |
| Corn starch               | 65.8      | 0.8  | 65.57 | 0.57 | 65.56 | 0.56 |
| Fructose                  | 0         | 65.0 | 0     | 65.0 | 0     | 65.0 |

|                                              |   |   |              |              |               |               |
|----------------------------------------------|---|---|--------------|--------------|---------------|---------------|
| Calculated dietary contents                  |   |   |              |              |               |               |
| Total polyphenols                            | 0 | 0 | 0.203        | 0.203        | 0.197         | 0.197         |
| Ellagitannins ( <i>monomer:dimer ratio</i> ) | 0 | 0 | 0.184 (96:4) | 0.184 (96:4) | 0.138 (40:60) | 0.138 (40:60) |
| Proanthocyanidins                            | 0 | 0 | 0.019        | 0.019        | 0.057         | 0.057         |

ET – ellagitannins.

<sup>1</sup> The  $\alpha$ -cellulose preparation was obtained from Sigma-Aldrich (No. C8002).

<sup>2</sup> AIN-93G (Reeves 1997)<sup>18</sup>, g per kg mix: 357 g anhydrous calcium carbonate (40.04% Ca), 196 g monobasic potassium phosphate (22.76% P, 28.73% K), 70.78 g potassium citrate and tripotassium monohydrate (36.16% K), 74 g sodium chloride (39.34% Na, 60.66% Cl), 46.6 g potassium sulfate (44.87% K, 18.39% S), 24 g magnesium oxide (60.32% Mg), 6.06 g ferric citrate (16.5% Fe), 1.65 g zinc carbonate (52.14% Zn), 1.45 g sodium meta-silicate 9 9H<sub>2</sub>O (9.88% Si), 0.63 g manganous carbonate (47.79% Mn), 0.3 g cupric carbonate (57.47% Cu), 221.026 g powdered sucrose, and 0.275 g chromium potassium sulfate  $\times$  12H<sub>2</sub>O (10.42% Cr). The following components were added in mg per kg mix quantities: 81.5 mg boric acid (17.5% B), 63.5 mg sodium fluoride (45.24% F), 31.8 mg nickel carbonate (45% Ni), 17.4 mg lithium chloride (16.38% Li), 10.25 mg anhydrous sodium selenate (41.79% Se), 10 mg potassium iodate (59.3% I), 7.95 mg ammonium paramolybdate  $\times$  4H<sub>2</sub>O (54.34% Mo), and 6.6 mg ammonium vanadate (43.55% V).

<sup>3</sup> AIN-93G (Reeves 1997)<sup>18</sup>, g per kg mix: 3.0 g nicotinic acid, 1.6 g Ca pantothenate, 0.7 g pyridoxine-HCl, 0.6 g thiamine-HCl, 974.655 g powdered sucrose, 0.6 g riboflavin, 0.2 g folic acid, 0.02 g biotin, 2.5 g vit. B<sub>12</sub> (cyanocobalamin, 0.1% in mannitol). The following components were added in IU per g quantities: 15.0 IU vit. E (all-rac- $\alpha$ -tocopheryl acetate, 500), 0.8 IU vit. A (all-trans-retinyl palmitate, 500000), 0.25 IU vit. D<sub>3</sub> (chole-calciferol, 400000), and 0.075 IU vit. K-1 (phylloquinone).

**Table S2. Large intestinal indices of rats fed experimental diets \*.**

|             | Cecum               |                      |       |                        |       | Colon               |                      |       |
|-------------|---------------------|----------------------|-------|------------------------|-------|---------------------|----------------------|-------|
|             | tissue <sup>1</sup> | digesta <sup>1</sup> | DM, % | NH <sub>3</sub> , mg/g | pH    | tissue <sup>1</sup> | digesta <sup>1</sup> | pH    |
| Group (n=8) |                     |                      |       |                        |       |                     |                      |       |
| C           | 0.162               | 0.512                | 24.7  | 0.234                  | 7.38  | 0.296               | 0.313                | 7.65  |
| F           | 0.170               | 0.661                | 25.3  | 0.247                  | 7.44  | 0.337               | 0.504                | 9.64  |
| C+ME        | 0.168               | 0.529                | 25.3  | 0.240                  | 7.36  | 0.287               | 0.324                | 7.62  |
| F+ME        | 0.167               | 0.504                | 25.7  | 0.241                  | 7.40  | 0.326               | 0.383                | 7.57  |
| C+DE        | 0.162               | 0.529                | 25.6  | 0.257                  | 7.46  | 0.294               | 0.294                | 7.66  |
| F+DE        | 0.178               | 0.599                | 26.5  | 0.231                  | 7.45  | 0.295               | 0.393                | 7.66  |
| SEM         | 0.002               | 0.017                | 0.302 | 0.006                  | 0.035 | 0.008               | 0.021                | 0.038 |
| Extract (E) |                     |                      |       |                        |       |                     |                      |       |
| - (without) | 0.166               | 0.586                | 25.0  | 0.241                  | 7.41  | 0.316               | 0.408                | 7.64  |
| ME          | 0.167               | 0.516                | 25.5  | 0.240                  | 7.38  | 0.307               | 0.353                | 7.59  |

|                 |           |                    |           |           |           |           |                    |           |
|-----------------|-----------|--------------------|-----------|-----------|-----------|-----------|--------------------|-----------|
| DE              | 0.170     | 0.564              | 26.1      | 0.244     | 7.46      | 0.294     | 0.344              | 7.66      |
| <i>P value</i>  | <i>NS</i> | <i>NS</i>          | <i>NS</i> | <i>NS</i> | <i>NS</i> | <i>NS</i> | <i>NS</i>          | <i>NS</i> |
| Diet (D)        |           |                    |           |           |           |           |                    |           |
| Corn starch     | 0.164     | 0.523 <sup>b</sup> | 25.2      | 0.244     | 7.40      | 0.292     | 0.310 <sup>b</sup> | 7.64      |
| Fructose        | 0.172     | 0.588 <sup>a</sup> | 25.8      | 0.240     | 7.43      | 0.319     | 0.427 <sup>a</sup> | 7.62      |
| <i>P value</i>  | <i>NS</i> | <i>0.046</i>       | <i>NS</i> | <i>NS</i> | <i>NS</i> | <i>NS</i> | <i>0.004</i>       | <i>NS</i> |
| Interaction E×D |           |                    |           |           |           |           |                    |           |
| <i>P value</i>  | <i>NS</i> | <i>NS</i>          | <i>NS</i> | <i>NS</i> | <i>NS</i> | <i>NS</i> | <i>NS</i>          | <i>NS</i> |

\* C, control fed a diet with 65.8% corn starch; F, fed a diet with 65.0% fructose (F) added at the expense of corn starch; C+ME, fed a corn starch diet with a monomeric ET-rich extract; F+ME, fed a fructose diet with a monomeric ET-rich extract; C+DE, fed a corn starch diet with a dimeric ET-rich extract; F+DE, fed a fructose diet with a dimeric ET-rich extract. <sup>a,b</sup> Mean values within a column with unlike superscript letters were shown to be significantly different ( $P<0.05$ ); differences among the groups (C, F, C+ME, F+ME, C+DE, F+DE) are indicated with superscripts only in the case of a statistically significant interaction E×D ( $P<0.05$ ). <sup>1</sup>mass, g/100 g BW; DM, dry matter.
